# Supplementary material
Source: PubMed Central journal article supplement (PMC2664071)
Supplement: 0900615106_0900615106SI.pdf [file 0900615106_0900615106SI.pdf]

# Supporting Information

Zagury et al. 10.1073/pnas.0900615106

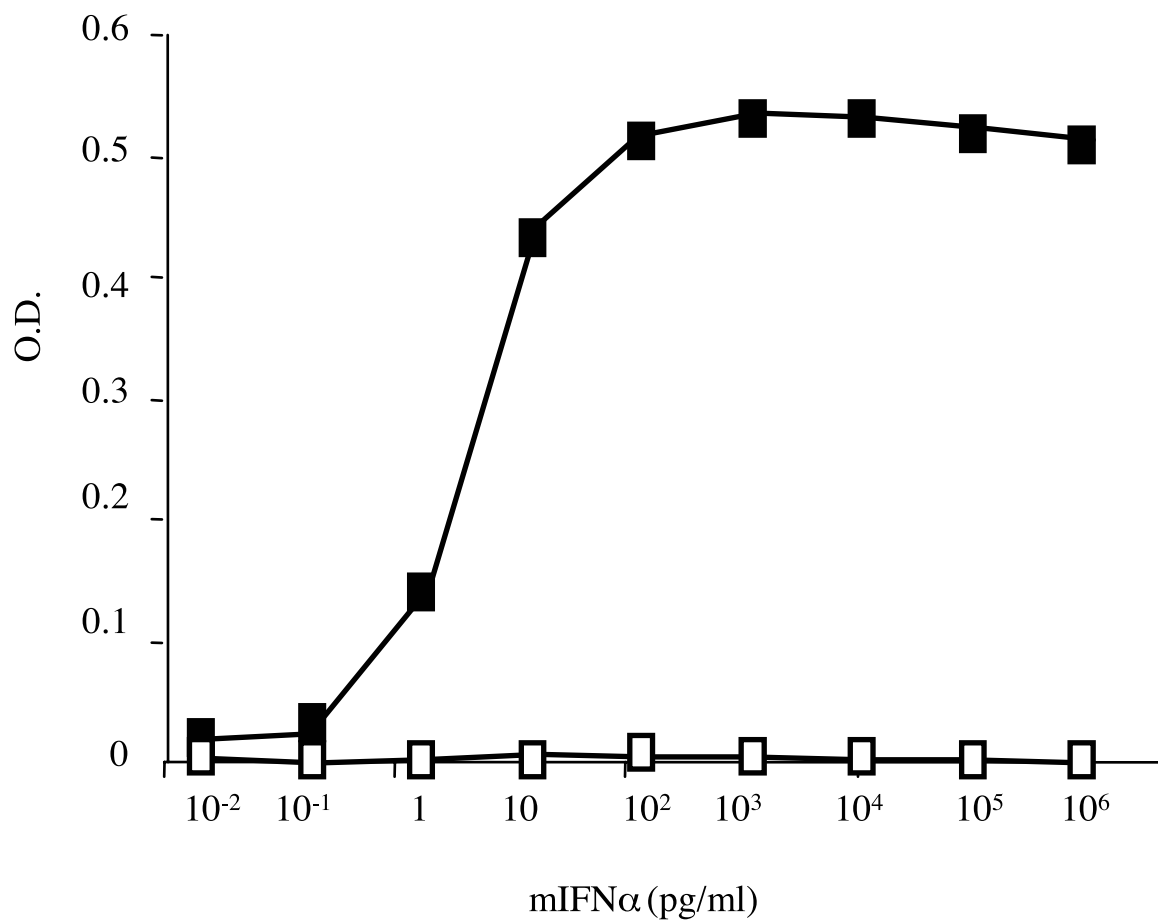

**Fig. S1.** Comparative evaluation of biological activity of native murine IFN $\alpha$  (mIFN $\alpha$ ; filled symbols) versus mIFN $\alpha$  kinoid (open symbols) on encephalomyocarditis virus (EMCV)-infected L929 cells. Inhibition of viral-induced cytopathic effect (CPE) by mIFN $\alpha$  was measured by 3-(4,5-dimethylthiazol-2-yl)-2,5-diphenyl tetrazolium bromide (MTT) assays (see *Materials and Methods*).



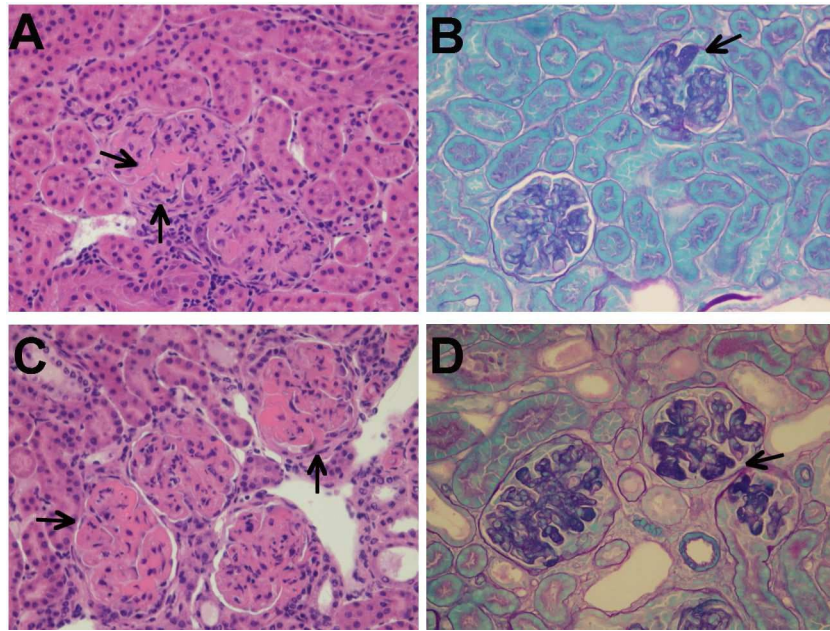

**Fig. S3.** Representative tissue sections of kidneys from NZB/W mice stained with H&E (*Left*) or periodic acid/Schiff light green (*Right*), illustrating the extensive lesions as reported in the main text. (Original magnification, 40 $\times$ .) (*A and B*) Animal no. 1: severe glomerular deposits (indicated by black arrows). These were seen in the majority of glomeruli; the overall grading was 4. Some sclerosis is present in the H&E photograph (upward arrow). (*C and D*) Animal no. 2: extensive deposits were noted in all glomeruli, with sclerosis seen in the H&E and thickening of basement membranes in tubules; the overall grading was 5.

**Table S1. Pool of sera from positive control (group A), kinoid-immunized (group B), and \*KLH-immunized (group C) animals collected 7 days after last boosting, were tested as to their content in anti-IFN $\alpha$  Ab classes by ELISA**

| Group | Immunization        | IgG1             | IgG2a            | IgG2b            | IgG3            | IgA  | IgM             |
|-------|---------------------|------------------|------------------|------------------|-----------------|------|-----------------|
| A     | PBS control         | <100             | <100             | <100             | <100            | <100 | 100             |
| B     | IFN $\alpha$ kinoid | $>2 \times 10^5$ | $>2 \times 10^5$ | $>2 \times 10^5$ | $3 \times 10^3$ | <100 | $3 \times 10^3$ |
| C     | *KLH                | 100              | <100             | 100              | <100            | <100 | 300             |

Results are expressed as the reciprocal of the serum dilution at an OD  $\geq 0.300$ . Only sera from group B animals exhibit significant high titers of anti-IFN $\alpha$  Abs.

Table S2. Circulating mIFN $\alpha$  measured by ELISA (PBL Biomedical Laboratories) and expressed as IU/mL of mouse serum

| Groups                                        | D-15                     | D0            | D7                      | D28                     | D49                     | D77                    | D109                   |
|-----------------------------------------------|--------------------------|---------------|-------------------------|-------------------------|-------------------------|------------------------|------------------------|
| <b>A</b><br>Positive control<br>(n mice)      | 3.8 $\pm$ 1.1<br>(n=12)  | Adv challenge | 4.8 $\pm$ 2.9<br>(n=12) | 5.2 $\pm$ 2.1<br>(n=11) | 5.1 $\pm$ 1.0<br>(n=6)  | 4.9<br>(n=1)           | -<br>(n=0)             |
| <b>B</b><br>Kinoid-immunized mice<br>(n mice) | 3.4 $\pm$ 1.05<br>(n=12) |               | 5.5 $\pm$ 3.2<br>(n=12) | 6.1 $\pm$ 3.5<br>(n=12) | 5.9 $\pm$ 1.1<br>(n=10) | 6.0 $\pm$ 0.6<br>(n=7) | 0.9 $\pm$ 2.2<br>(n=7) |
| <b>C</b><br>KLH-immunized mice<br>(n mice)    | 3.7 $\pm$ 0.4<br>(n=12)  |               | 5.5 $\pm$ 2.2<br>(n=12) | 4.6 $\pm$ 1.1<br>(n=12) | 5.0 $\pm$ 1.0<br>(n=12) | 5.3 $\pm$ 0.6<br>(n=5) | 0.3<br>(n=1)           |
| <b>D</b><br>Reference<br>(n mice)             | 3.7 $\pm$ 0.4<br>(n=7)   |               | 2.8 $\pm$ 0.3<br>(n=7)  | 3.1 $\pm$ 0.3<br>(n=7)  | 6.0 $\pm$ 1.4<br>(n=7)  | 5.5 $\pm$ 0.8<br>(n=6) | 0.1 $\pm$ 0.3<br>(n=6) |

Data are expressed by the mean  $\pm$  SD of tested serum samples correspond to estimated values, given the sensitivity threshold of the kit (PBL Biomedical Laboratories).

**Table S3. Comparative evolution of clinical end points in the different groups of mice**

| Groups                                                     | Anti-mIFN $\alpha$<br>serum IC at peak | Proteinuria, onset day<br>after challenge* | Death, onset day<br>after challenge* |
|------------------------------------------------------------|----------------------------------------|--------------------------------------------|--------------------------------------|
| A: Positive control                                        | Bg <sup>†</sup>                        | d32                                        | d47                                  |
| B: Kinoid-immunized                                        | 1,550                                  | d95                                        | d121                                 |
| Responders (B1–B6)                                         | 2,750                                  | d116                                       | d123                                 |
| Non/low responders (B7–B12)                                | 500                                    | d55                                        | d74                                  |
| C: KLH-immunized                                           | Bg                                     | d53                                        | d74                                  |
| D: Negative reference (without IFN $\alpha$ Adv treatment) | Bg                                     | d95                                        | d112                                 |

\*Data correspond to the median in each group.

<sup>†</sup>Bg, serum IC background ( $\leq 400$ /mL).

**Table S4. Histological lesions of kidneys collected from surviving mice at autopsy (day 123 after challenge)**

| Microscopic findings*,<br>kidneys | Kinoid-immunized/IFN $\alpha$ Adv (group B) |   |    |    |     |        |    |   |     |     |        |        | KLH-<br>immunized/<br>IFN $\alpha$ Adv<br>(group C) |     | PBS/CT Adv reference (group D) |     |    |    |        |        |     |     |
|-----------------------------------|---------------------------------------------|---|----|----|-----|--------|----|---|-----|-----|--------|--------|-----------------------------------------------------|-----|--------------------------------|-----|----|----|--------|--------|-----|-----|
|                                   | B1                                          |   | B2 |    | B3  |        | B4 |   | B5  |     | B6     |        | C1                                                  |     | D1                             |     | D2 |    | D3     |        | D4  |     |
|                                   | 1                                           | 2 | 1  | 2  | 1   | 2      | 1  | 2 | 1   | 2   | 1      | 2      | 1                                                   | 2   | 1                              | 2   | 1  | 2  | 1      | 2      | 1   | 2   |
| Glomerular deposition             |                                             |   |    |    | Min | Slight |    |   | Min | Min | Slight | Slight | Mod                                                 | Mod | Mod                            | Mod |    |    | Slight | Slight | Min | Min |
| Glomerular sclerosis              |                                             |   |    |    | 2   | 2      |    |   | 2   | 2   | 2      | 3      | 5                                                   | 4   | 5                              | 5   |    |    | 4      | 4      | 2   | 1   |
| Tubular basophilia                |                                             |   |    |    |     |        |    |   |     |     |        |        |                                                     |     |                                |     |    |    |        |        |     |     |
| Tubular degeneration              |                                             |   |    |    |     |        |    |   |     |     |        |        |                                                     |     |                                |     |    |    |        |        |     |     |
| Protein droplets in tubules       |                                             |   |    |    | 1   | 1      |    |   |     |     |        |        |                                                     |     |                                |     |    |    |        |        |     |     |
| Protein (hyaline) casts           |                                             |   |    |    |     |        |    |   | 1   | 2   | 2      | 2      | 3                                                   | 2   | 2                              | 2   |    |    | 1      | 1      | 1   | 1   |
| Inflammation interstitial         |                                             |   |    |    |     |        |    |   |     |     |        |        |                                                     |     |                                |     |    |    |        |        |     |     |
| Lymphoid deposits, pelvic         |                                             |   | 1F | 2F | 3F  | 1F     |    |   | 1F  | 1F  | 1F     |        | 3F                                                  |     |                                |     | 1F | 1F | 3F     | 1F     |     | 2F  |
| Overall score <sup>†</sup>        | 0                                           | 1 |    |    | 1   | 2      |    |   | 2   |     |        | 2      | 5                                                   |     |                                | 4   | 1  |    | 4      |        |     | 2   |

\*Both H&E slides and tissue sections stained with periodic acid/Schiff light green were blindly evaluated.

<sup>†</sup>Gradings used. All gradings of severity are indicative of total effect, e.g., estimated percentage of tubules with hyaline cast in the section examined. Grade 1, <20%; 2, 20–40%; 3, 40–60%; 4, 60–80%; 5, 80–100%. For glomeruli, the minimal (Min), Slight, Mod, and Sev are used to indicate the general level of alteration and the grade the extent as a percentage, e.g., minimal 2 implies that 20–40% are affected but at a minimal level. Findings limited to a particular area, e.g. lymphoid deposits, were designated with a F for focal or D for diffuse. The overall score for a kidney is based on an evaluation of the overall condition of the kidney, using an arbitrary scale of 1–5, 1 being the most normal and 5 being severely affected.
